# Supplementary material
Source: HighWire-hosted journal article supplement (https://jmg.bmj.com/content/61/2/158)
Supplement: inline-supplementary-material-2 [file inline-supplementary-material-2.pdf]

## Supplemental Table 1

| Gene name      | Location | Variant classification | HGVS <sub>c</sub>            | HGVS <sub>p</sub>                     | Consequence                           | CONSTITUTIONAL DNA |         |       | TUMOR DNA   |         |       | TUMOR RNA |
|----------------|----------|------------------------|------------------------------|---------------------------------------|---------------------------------------|--------------------|---------|-------|-------------|---------|-------|-----------|
|                |          |                        |                              |                                       |                                       | Copy number        | VAF (%) | Depth | Copy number | VAF (%) | Depth | VAF (%)   |
| <i>PMS2</i>    | Chr7     | PV / SNV               | NM_000088.4:<br>c.695G>T     | NP_000526.2:<br>p.(Gly232Val)         | Missense variant                      | 2                  | 55      | 84    | .           | 50      | 147   | 68        |
| <i>NF1</i>     | Chr17    | PV / insertion         | NM_000267.3:<br>c.2033dup    | NP_000258.1:<br>p.(Ile679Aspfs*21)    | Frameshift variant                    | 2                  | 20      | 119   | .           | 47      | 215   | 0         |
| <i>PMS2</i>    | Chr7     | PV / SNV               | NM_000535.7:<br>c.2275+1G>A  | .                                     | Splice donor variant                  | 2                  | 45      | 62    | .           | 29      | 139   | 0         |
| <i>TP53</i>    | Chr17    | PV / SNV               | NM_000546.6:<br>c.817C>T     | NP_000537.3:<br>p.(Arg273Cys)         | Missense variant                      | .                  | .       | .     | 2           | 48      | 223   | 77        |
| <i>FANCA</i>   | Chr16    | PV / SNV               | NM_000135.4:<br>c.3624C>T    | NP_000126.2: p.(Ser1208=)             | Splice region &<br>synonymous variant | .                  | .       | .     | 2           | 47      | 143   | 0         |
| <i>TGFBR2</i>  | Chr3     | PV / SNV               | NM_003242.6:<br>c.1336G>A    | NP_001020018.1:<br>p.(Asp446Asn)      | Missense variant                      | .                  | .       | .     | 2           | 46      | 215   | 15        |
| <i>SETD2</i>   | Chr3     | PV / insertion         | NM_001349370.3:<br>c.4087dup | NP_001336299.1:<br>p.(Arg1363Lysfs*8) | Frameshift variant                    | .                  | .       | .     | 2           | 45      | 244   | 22        |
| <i>SMO</i>     | Chr7     | PV / SNV               | NM_005631.5:<br>c.1965G>A    | NP_005622.1:<br>p.(Trp655*)           | Nonsense                              | .                  | .       | .     | 2           | 44      | 224   | 42        |
| <i>KDM6A</i>   | ChrX     | PV / SNV               | NM_001291415.2:<br>c.4207C>T | NP_001278344.1:<br>p.(Arg1403*)       | Nonsense                              | .                  | .       | .     | 2.1         | 41      | 241   | 0         |
| <i>POLE</i>    | Chr12    | PV / SNV               | NM_006231.4:<br>c.857C>G     | NP_006222.2:<br>p.(Pro286Arg)         | Missense variant                      | .                  | .       | .     | 2           | 41      | 115   | 58        |
| <i>ATR</i>     | Chr3     | PV / SNV               | NM_001184.4:<br>c.7597C>T    | NP_001175.2: p.(Arg2533*)             | Nonsense                              | .                  | .       | .     | 2           | 38      | 222   | 31        |
| <i>NF1</i>     | Chr17    | PV / SNV               | NM_000267.3:<br>c.532G>T     | NP_000258.1:<br>p.(Glu178*)           | Nonsense                              | .                  | .       | .     | 2           | 37      | 141   | 50        |
| <i>APC</i>     | Chr5     | PV / SNV               | NM_000038.6:<br>c.2626C>T    | NP_000029.2:<br>p.(Arg876*)           | Nonsense                              | .                  | .       | .     | 2           | 34      | 307   | 50        |
| <i>TP53</i>    | Chr17    | PV / SNV               | NM_001126112.3:<br>c.586C>T  | NP_001119584.1:<br>p.(Arg196*)        | Nonsense                              | .                  | .       | .     | 2           | 30      | 253   | 0         |
| <i>PPP2R1A</i> | Chr19    | PV / SNV               | NM_001363656.2:<br>c.7C>T    | NP_001350585.1:<br>p.(Arg3Trp)        | Missense variant                      | .                  | .       | .     | 2           | 25      | 213   | 28        |
| <i>ARID1B</i>  | Chr6     | PV / SNV               | NM_001346813.1:<br>c.2455C>T | NP_001333742.1:<br>p.(Gln819*)        | Nonsense                              | .                  | .       | .     | 2           | 14      | 238   | 16        |

Abbreviation : VAF : variant allele frequency, PV : pathogenic variant, SVN : small nucleotide variant
